# Supplementary material for: An Evaluative Review of Interview and Rating/Checklist Instruments for Assessing Social/Emotional Competence in Preschool Children.
Source: Royal Society of Chemistry journal article supplement (doi:10.1039/d4ra00209a), 1994-01-01
Supplement: d4ra00209a1.pdf [file d4ra00209a1.pdf]

**Supporting Information**

**One-step hydrothermal growth of porous nickel manganese layered double hydroxide nanosheets film towards efficient visible-light modulation**

Xingzhe Feng, Xinyi Wan, Ting Yang, Jiahui Huang, Jinmin Wang, Dongyun Ma\*

*School of Materials and Chemistry, University of Shanghai for Science and Technology, Shanghai 200093, China*

Corresponding authors: D. Ma

Email addresses: [dyma@usst.edu.cn](mailto:dyma@usst.edu.cn)

## Supplementary Figures

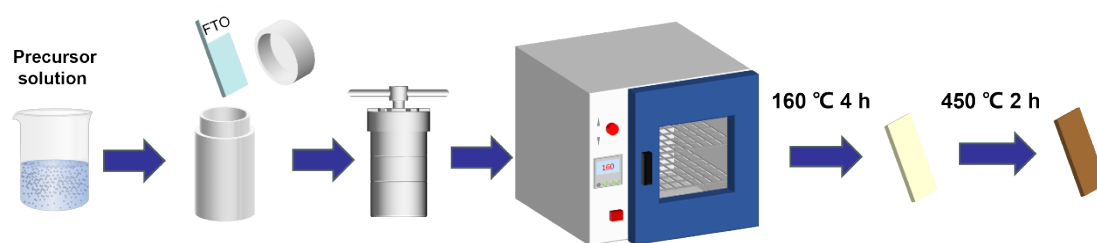

**Fig. S1.** Schematic diagram for the hydrothermal preparation process of NiMn-LDH film and subsequent annealing process.

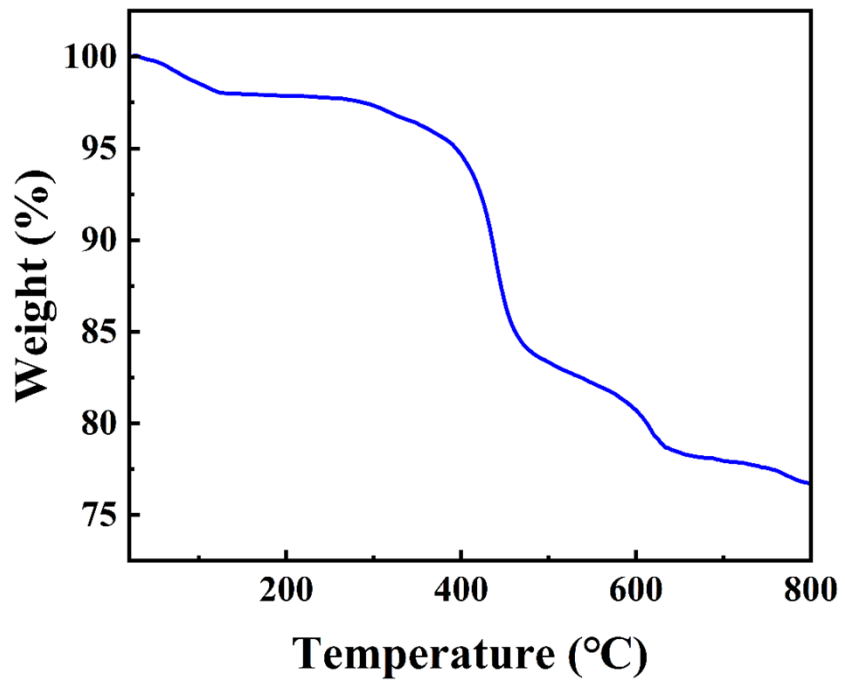

Fig. S2. TG curves of the NiMn-LDH powders.

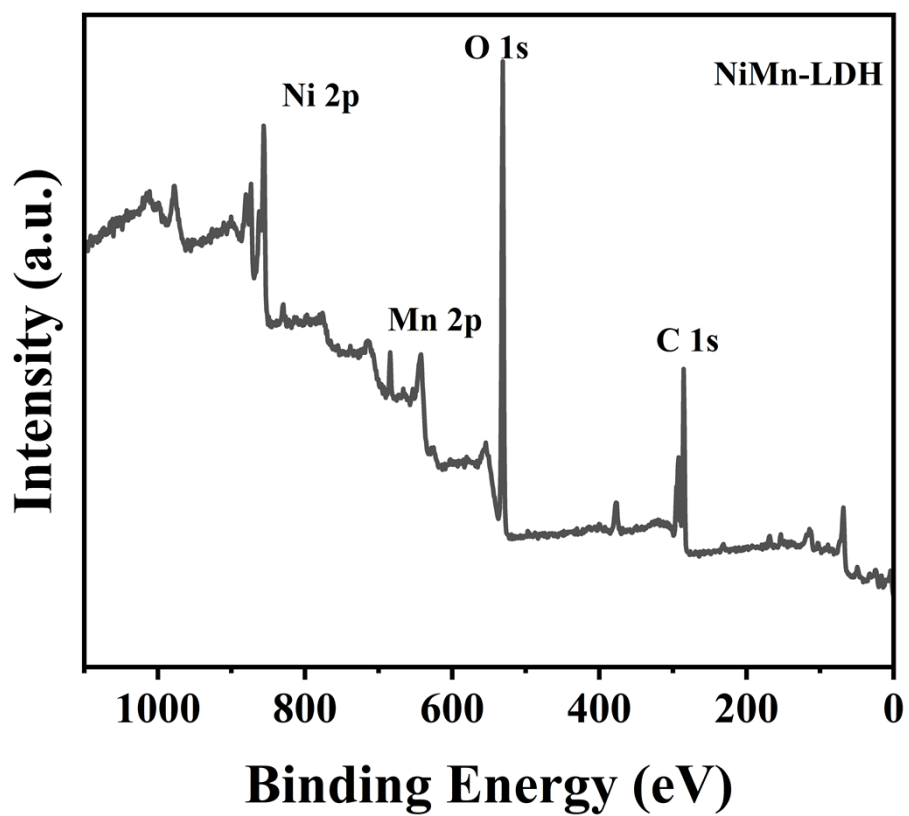

Fig. S3. The XPS survey spectrum of the as-grown NiMn-LDH film.

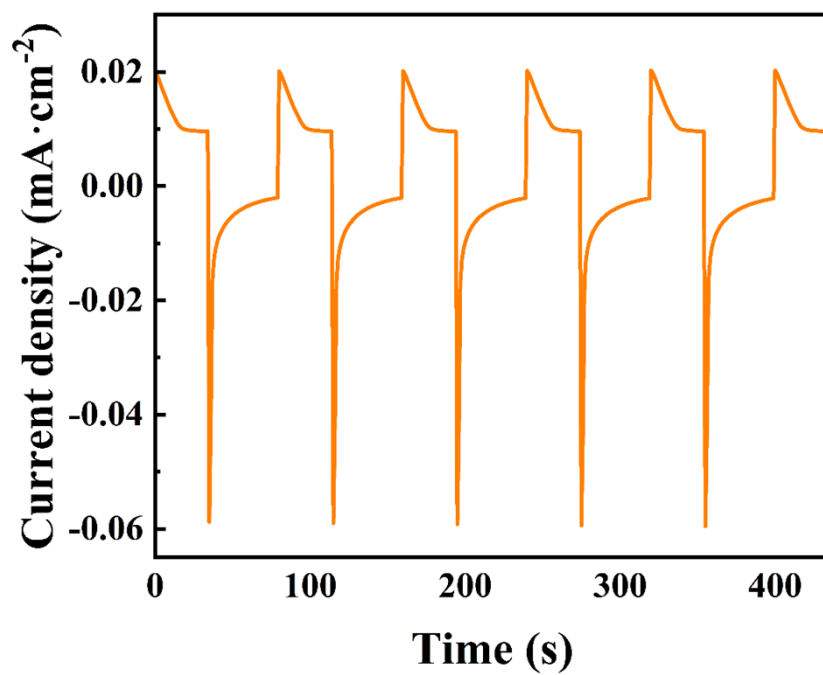

**Fig. S4.** Time-current curves of the NiMn-LDH film measured at -1.2 V for 45 s and 1 V for 35 s.

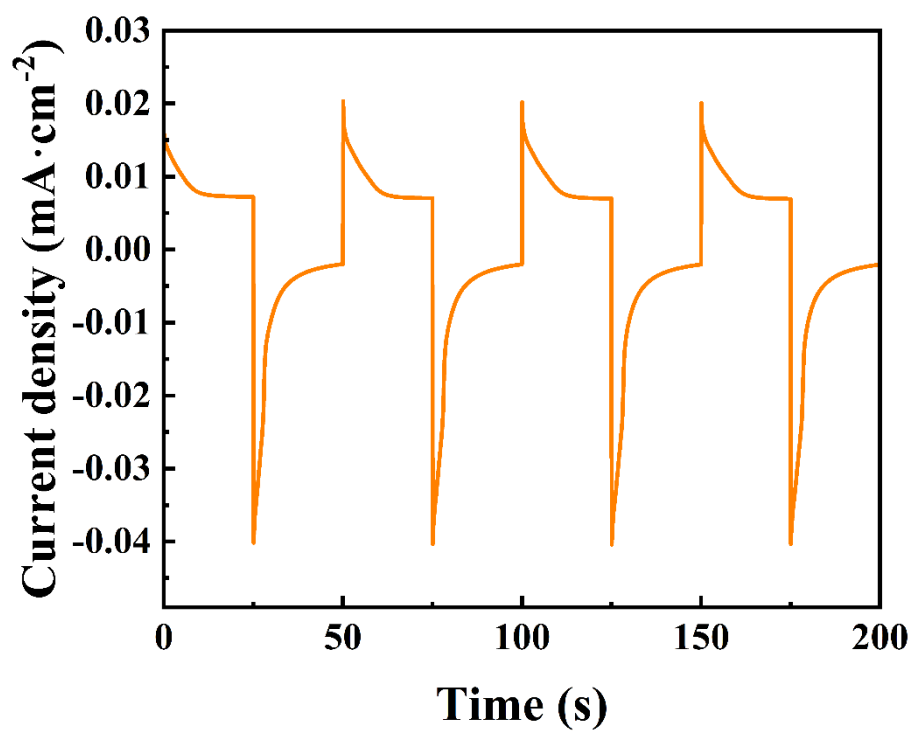

**Fig. S5.** Time-current curves of the Ni<sub>6</sub>MnO<sub>8</sub> film measured at -1.2 V for 25 s and 1 V for 25 s.

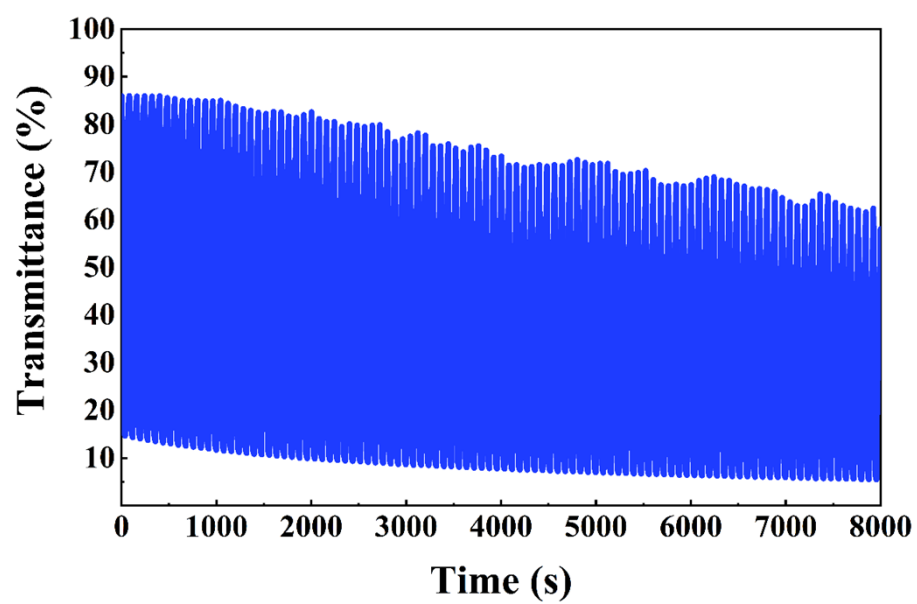

**Fig. S6.** Cycle performance of the NiMn-LDH film recorded at a wavelength of 550 nm.

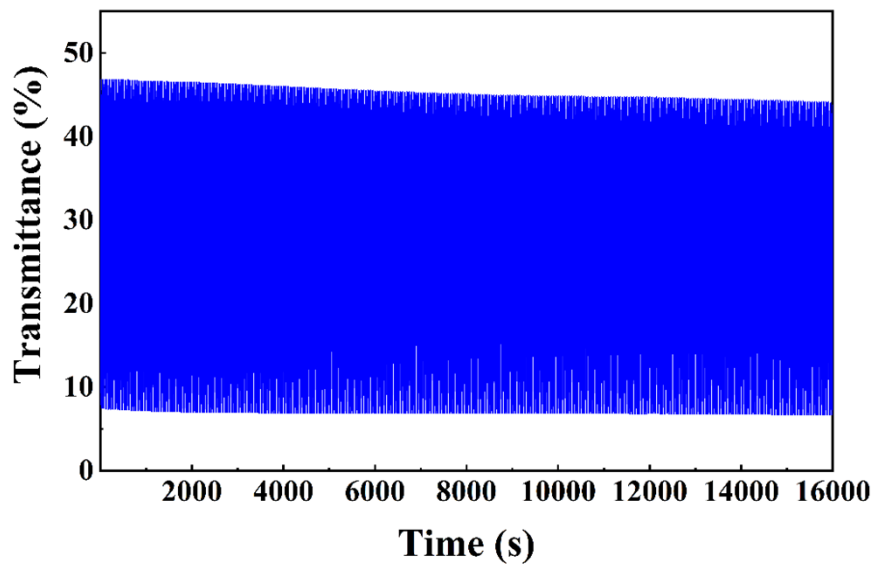

**Fig. S7.** Cycle performance of the Ni<sub>6</sub>MnO<sub>8</sub> film recorded at a wavelength of 550 nm.



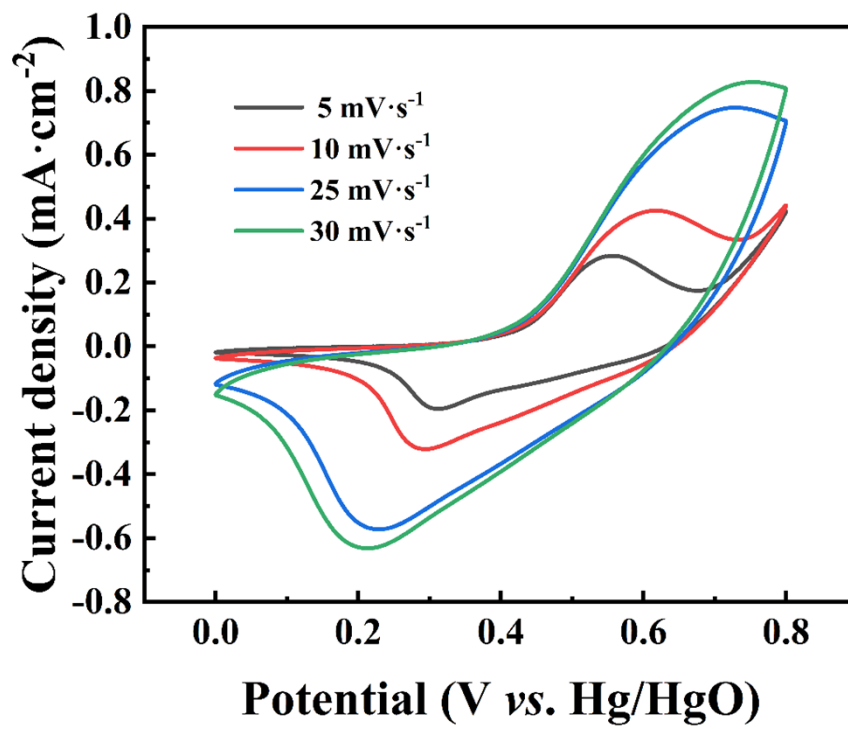

Fig. S8. CV curves of the NiMn-LDH film at different scan rates.

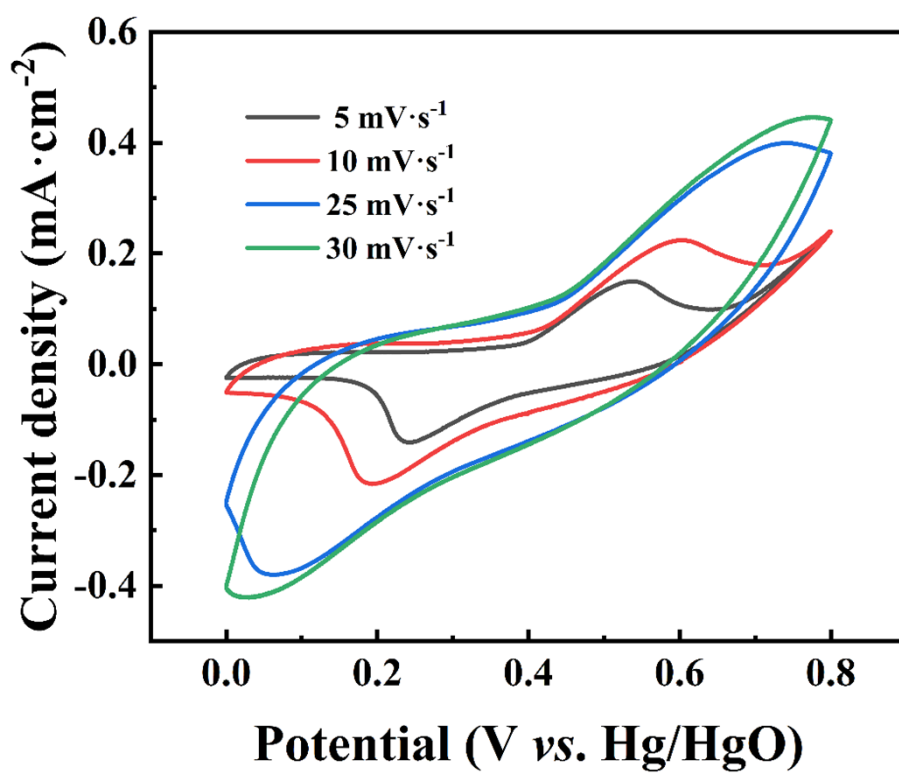

Fig. S9. CV curves of the  $\text{Ni}_6\text{MnO}_8$  film at different scan rates.

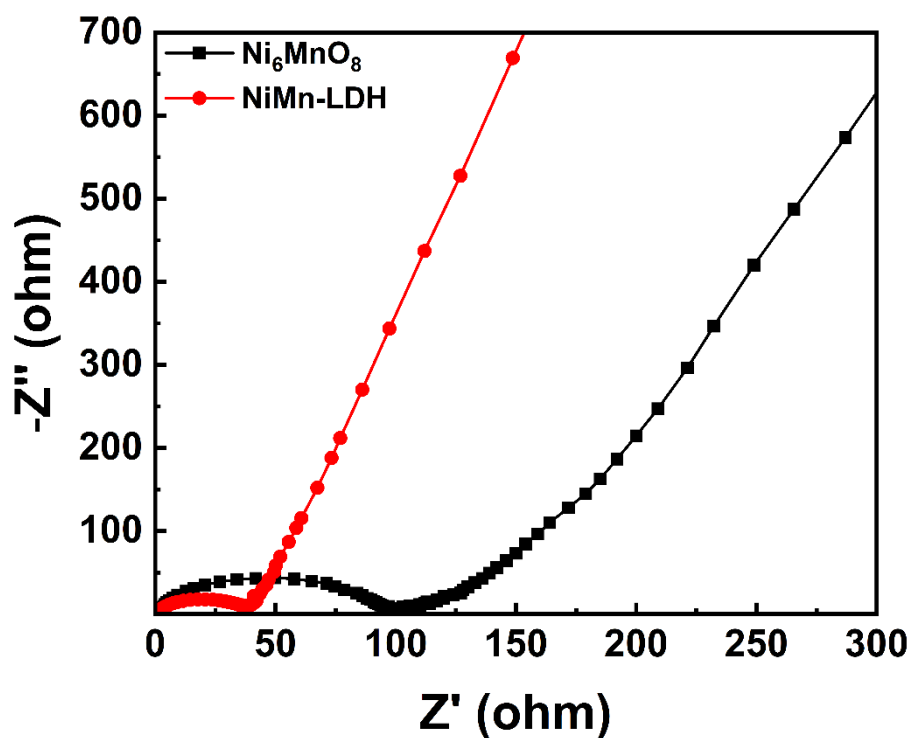

**Fig. S10.** EIS curves of (a) the NiMn-LDH film and (b) Ni<sub>6</sub>MnO<sub>8</sub> film.

Electrochemical impedance spectroscopy (EIS) was conducted to estimate the conductivity of the as-prepared film electrodes. Fig. S10 shows the resulting Nyquist plots of NiMn-LDH and Ni<sub>6</sub>MnO<sub>8</sub> film electrodes. The EIS curves of both electrodes consist of a straight line and a semicircle. The typical semicircle in the high-frequency region is attributed to the charge transfer resistance ( $R_{ct}$ ) caused by a faradic reaction that occurred at the active material surface.<sup>1,2</sup> Accordingly, the calculated  $R_{ct}$  for the NiMn-LDH and Ni<sub>6</sub>MnO<sub>8</sub> film electrodes are 19.8  $\Omega$  and 49.1  $\Omega$ , respectively.

## Supplementary Tables

**Table S1.** Microstructural parameters of different samples

| Samples                          | Average crystallite size (D) nm | Dislocation density ( $\delta \times 10^{15}$ ) m <sup>-2</sup> | Strain ( $\epsilon \times 10^{-2}$ ) nm <sup>-2</sup> |
|----------------------------------|---------------------------------|-----------------------------------------------------------------|-------------------------------------------------------|
| NiMn-LDH                         | 22.6                            | 0.0021                                                          | 0.42                                                  |
| Ni <sub>6</sub> MnO <sub>8</sub> | 9.9                             | 0.0037                                                          | 0.76                                                  |

“Various microstructural parameters are calculated from the XRD data and  $2\theta$  values of the diffraction peaks. The average crystallite sizes of the two samples are calculated by using Sherrer’s equation as follows:

$$(D) = \frac{0.9\lambda}{\beta \cos\theta}$$

where  $\lambda$  denotes the wavelength of Cu K $\alpha$  line (1.54 Å),  $\beta$  corresponds to full-width at half maximum, and  $\theta$  is the Bragg’s angle.<sup>6</sup> The lattice strain ( $\epsilon$ ) and dislocation density ( $\delta$ ) are also calculated by using the following equation:<sup>7,8</sup>

$$(\epsilon) = \frac{\beta \cot \theta}{4}$$

$$(\delta) = \frac{1}{D^2}$$

The calculated above parameters for NiMn-LDH and Ni<sub>6</sub>MnO<sub>8</sub> are summarized in Table S1.”

**Table S2.** Electrochromic properties of the different LDH films.

| Film          | $\Delta T$ (%)  | $t_c$ (s) | $t_b$ (s) | $CE$ (cm <sup>2</sup> ·C <sup>-1</sup> ) | Ref.      |
|---------------|-----------------|-----------|-----------|------------------------------------------|-----------|
| ZnO@Ni/Co-LDH | 56.0% (550 nm)  | 0.7       | 2.7       | —                                        | [1]       |
| NiAl-LDH      | 69.0% (400 nm)  | 45        | 45        | 30                                       | [2]       |
| PEDOT:PSS/LDH | 32.0% (650 nm), | 0.27      | 0.18      | 159                                      | [3]       |
| NiMn-LDH      | 68.5% (550 nm)  | 14.2      | 26.1      | 56.2                                     | This work |

## References

- [1] M. Yu, R. Liu, J. Liu, S. Li and Y. Ma, *Small*, 2017, **13**, 1702616.
- [2] M. M. Baig, M. T. Mehran, R. Khan, K. Mahmood, S. R. Naqvi, A. H. Khoja and I. H. Gul, *Surf Coat Tech.*, 2021, **421**, 127455.
- [3] X. Liu, J. Wang, D. Tang, Z. Tong, H. Ji and H. Qu, *J. Electroanal. Chem.*, 2012, **687**, 58-63.
- [4] D. Mondal and G. Villemure, *ACS Appl. Nano Mater.*, 2020, **3**, 6552-6562.
- [5] A. Zhou, X. Liu, Y. Dou, S. Guan, J. Han and M. Wei, *J. Mater. Chem. C*, 2016, **4**, 8284-8290.
- [6] S. Supriya, S. Das, S. Senapati and R. Naik, *J. Am. Ceram. Soc.*, 2023, **106**, 5955-5964.
- [7] P. Priyadarshini, S. Das, D. Alagarasan, R. Ganesan, S. Varadharajaperumal and R. Naik, *Scientific Reports.*, 2021, **11**, 21518.
- [8] A. Parida, S. Senapati, S. Samal, S. Bisoyi and R. Naik, *ACS Appl. Nano Mater.*, 2023, **6**, 11230-11241.
